# Supplementary material for: Evaluation of the interchangeability of C–H and C–F groups: insights from crystal packing in a series of isomeric fluorinated benzanilides
Source: Royal Society of Chemistry journal article supplement (doi:10.1039/b709938j), 2007-09-10
Supplement: b709938j.pdf [file b709938j.pdf]

### Supplementary Information:

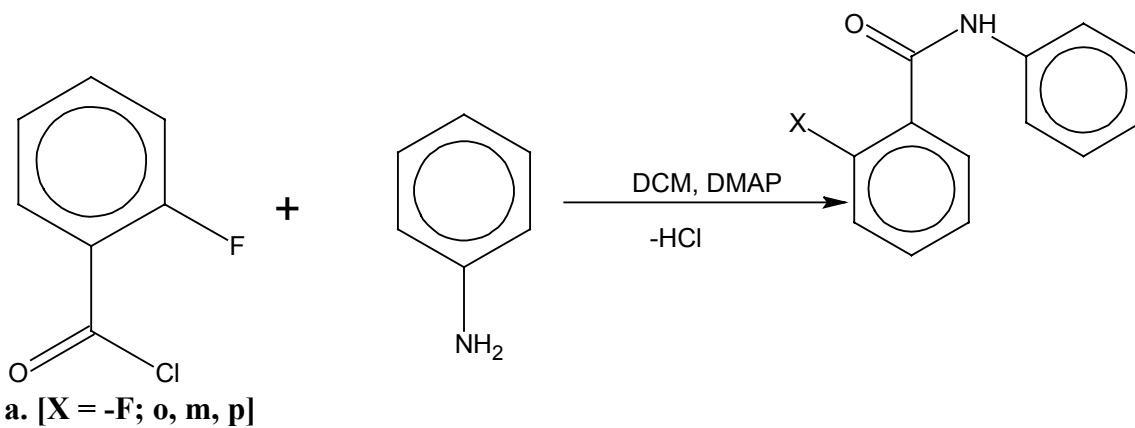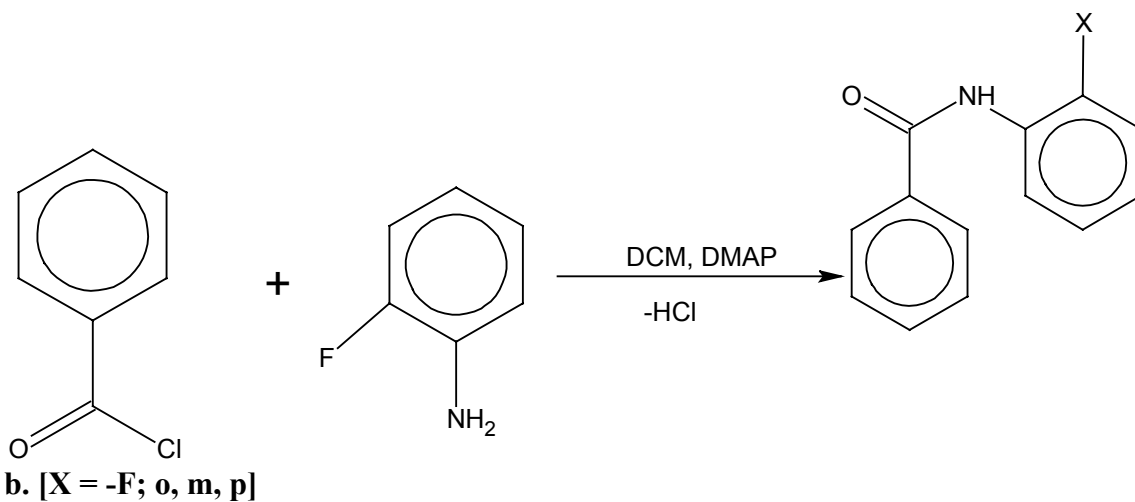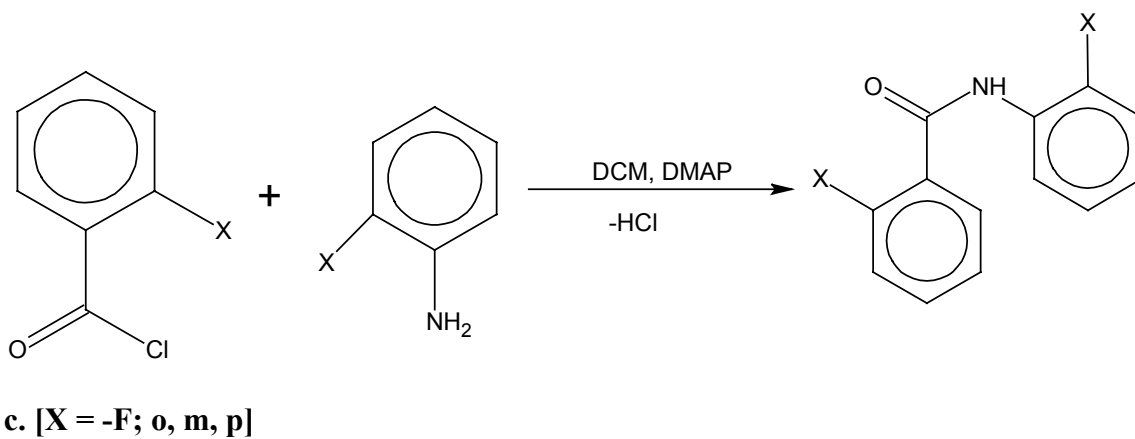

**Scheme S1:** Synthetic procedure.

**Table S1: Amounts of Reactants taken for the synthesis of substituted benzanilides.**

|            | <b>Starting materials</b>       | <b>Molecular Weight (g)</b> | <b>Weight taken (g)</b>      | <b>No of mmoles</b> |
|------------|---------------------------------|-----------------------------|------------------------------|---------------------|
| <b>DC1</b> | <b>Aniline</b>                  | 93.13 ( $\rho = 1.023$ )    | 0.104 (101.9 $\mu\text{l}$ ) | 1.12                |
|            | <b>o-FluoroBenzoyl Chloride</b> | 158.56 ( $\rho = 1.328$ )   | 0.178 (133.7 $\mu\text{l}$ ) | 1.12                |
|            | <b>DMAP</b>                     | 122.7                       | 0.160                        | 1.30                |
| <b>DC2</b> | <b>Aniline</b>                  | 93.13 ( $\rho = 1.023$ )    | 0.104 (101.9 $\mu\text{l}$ ) | 1.12                |
|            | <b>m-FluoroBenzoyl Chloride</b> | 158.56 ( $\rho = 1.304$ )   | 0.178 (136.2 $\mu\text{l}$ ) | 1.12                |
|            | <b>DMAP</b>                     | 122.7                       | 0.160                        | 1.30                |
| <b>DC3</b> | <b>Aniline</b>                  | 93.13 ( $\rho = 1.023$ )    | 0.104 (102 $\mu\text{l}$ )   | 1.12                |
|            | <b>p-FluoroBenzoyl Chloride</b> | 158.56 ( $\rho = 1.342$ )   | 0.178 (132.3 $\mu\text{l}$ ) | 1.12                |
|            | <b>DMAP</b>                     | 122.7                       | 0.160                        | 1.30                |
| <b>DC4</b> | <b>o-Fluoroaniline</b>          | 111.12 ( $\rho = 1.151$ )   | 0.128 (111 $\mu\text{l}$ )   | 1.12                |
|            | <b>Benzoyl Chloride</b>         | 140.57 ( $\rho = 1.211$ )   | 0.157 (130 $\mu\text{l}$ )   | 1.12                |
|            | <b>DMAP</b>                     | 122.7                       | 0.160                        | 1.30                |
| <b>DC5</b> | <b>m-Fluoroaniline</b>          | 111.12 ( $\rho = 1.156$ )   | 0.128 (110.6 $\mu\text{l}$ ) | 1.12                |
|            | <b>Benzoyl Chloride</b>         | 140.57 ( $\rho = 1.211$ )   | 0.157 (130 $\mu\text{l}$ )   | 1.12                |
|            | <b>DMAP</b>                     | 122.7                       | 0.160                        | 1.30                |
| <b>DC6</b> | <b>p-Fluoroaniline</b>          | 111.12 ( $\rho = 1.173$ )   | 0.129 (109.0 $\mu\text{l}$ ) | 1.12                |
|            | <b>Benzoyl Chloride</b>         | 140.57 ( $\rho = 1.211$ )   | 0.157 (130 $\mu\text{l}$ )   | 1.12                |
|            | <b>DMAP</b>                     | 122.7                       | 0.160                        | 1.30                |
| <b>DC7</b> | <b>o-FluoroAniline</b>          | 111.12 ( $\rho = 1.151$ )   | 0.262 (228 $\mu\text{l}$ )   | 2.36                |
|            | <b>o-FluoroBenzoyl Chloride</b> | 158.56 ( $\rho = 1.328$ )   | 0.374 (282 $\mu\text{l}$ )   | 2.36                |
|            | <b>DMAP</b>                     | 122.7                       | 0.320                        | 2.60                |
| <b>DC8</b> | <b>o-FluoroAniline</b>          | 111.12 ( $\rho = 1.151$ )   | 0.053 (46 $\mu\text{l}$ )    | 0.47                |
|            | <b>m-FluoroBenzoyl Chloride</b> | 158.56 ( $\rho = 1.304$ )   | 0.075 (57 $\mu\text{l}$ )    | 0.47                |
|            | <b>DMAP</b>                     | 122.7                       | 0.063                        | 0.52                |

|      | Starting materials              | Molecular Weight (g)      | Weight taken (g)             | No of mmoles |
|------|---------------------------------|---------------------------|------------------------------|--------------|
| DC9  | <b>o-FluoroAniline</b>          | 111.12 ( $\rho = 1.151$ ) | 0.262 (228 $\mu\text{l}$ )   | 2.36         |
|      | <b>p-FluoroBenzoyl Chloride</b> | 158.56 ( $\rho = 1.342$ ) | 0.374 (279 $\mu\text{l}$ )   | 2.36         |
|      | <b>DMAP</b>                     | 122.7                     | 0.320                        | 2.60         |
| DC10 | <b>m-FluoroAniline</b>          | 111.12 ( $\rho = 1.156$ ) | 0.262 (226.6 $\mu\text{l}$ ) | 2.36         |
|      | <b>o-FluoroBenzoyl Chloride</b> | 158.56 ( $\rho = 1.328$ ) | 0.374 (281.6 $\mu\text{l}$ ) | 2.36         |
|      | <b>DMAP</b>                     | 122.7                     | 0.32                         | 2.60         |
| DC11 | <b>m-FluoroAniline</b>          | 111.12 ( $\rho = 1.156$ ) | 0.052 (45 $\mu\text{l}$ )    | 0.47         |
|      | <b>m-FluoroBenzoyl Chloride</b> | 158.56 ( $\rho = 1.304$ ) | 0.075 (58 $\mu\text{l}$ )    | 0.47         |
|      | <b>DMAP</b>                     | 122.7                     | 0.063                        | 0.52         |
| DC12 | <b>m-FluoroAniline</b>          | 111.12 ( $\rho = 1.156$ ) | 0.262 (227 $\mu\text{l}$ )   | 2.36         |
|      | <b>p-FluoroBenzoyl Chloride</b> | 158.56 ( $\rho = 1.342$ ) | 0.374 (279 $\mu\text{l}$ )   | 2.36         |
|      | <b>DMAP</b>                     | 122.7                     | 0.32                         | 2.60         |
| DC13 | <b>p-FluoroAniline</b>          | 111.12 ( $\rho = 1.173$ ) | 0.052 (45 $\mu\text{l}$ )    | 0.47         |
|      | <b>o-FluoroBenzoyl Chloride</b> | 158.56 ( $\rho = 1.328$ ) | 0.075 (58 $\mu\text{l}$ )    | 0.47         |
|      | <b>DMAP</b>                     | 122.7                     | 0.063                        | 0.52         |
| DC14 | <b>p-FluoroAniline</b>          | 111.12 ( $\rho = 1.173$ ) | 0.052 (45 $\mu\text{l}$ )    | 0.47         |
|      | <b>m-FluoroBenzoyl Chloride</b> | 158.56 ( $\rho = 1.304$ ) | 0.075 (58 $\mu\text{l}$ )    | 0.47         |
|      | <b>DMAP</b>                     | 122.7                     | 0.063                        | 0.52         |
| DC15 | <b>p-FluoroAniline</b>          | 111.12 ( $\rho = 1.173$ ) | 0.052 (45 $\mu\text{l}$ )    | 0.47         |
|      | <b>p-FluoroBenzoyl Chloride</b> | 158.56 ( $\rho = 1.342$ ) | 0.075 (56 $\mu\text{l}$ )    | 0.47         |
|      | <b>DMAP</b>                     | 122.7                     | 0.063                        | 0.52         |

### Characterization of the prepared compounds:

IR-spectroscopy and Powder Diffraction was used to characterize the synthesized column pure compounds. DSC/ DTA measurements were done to determine the melting points accurately. Nonlinear Optical measurements on both the powdered samples and the crystals were also performed.

### **IR Measurements:**

Powdered samples were pelleted with dry KBr and the IR pattern was recorded on a Mettler Toledo instrument.

### **Powder Diffraction Measurements:**

Powder X-ray diffraction measurements were done on Philips X'Pert Pro X-Ray diffractometer operating at 40kV/30mA using  $\text{CuK}\alpha$  radiation in reflection mode. All the powder patterns were recorded between the  $2\theta$  ranges 3 - 50°, step size of 0.01° and time per step is 0.75 sec.

### **Non Linear Optical property (SHG measurements):**

In order to ascertain whether these compounds are good materials for exhibiting SHG property or not, measurements for the presence of non-linear optical property were performed on both the powdered samples and also the crystals. Powder SHG measurements were done in accordance with the Kurtz and Perry technique for NLO measurements on powdered materials using Quanta DCR3 LASER (1064nm) and a Photo Diode used as detector. 1064nm was cut off by a  $\text{CuSO}_4$  solution and BG38 filter. The sample was illuminated with a Nd:YAG laser emitting a fundamental wavelength of 1064 nm. A green signal (532nm) was observed proving that the material exhibits SHG activity. The corresponding output was recorded. The nature of the signal in case of both crystal and powder is the same.

### **Melting Point measurements:**

Differential thermal analysis on freshly powdered sample was recorded on a SDTQ600 instrument at 5 °C/min and by differential scanning calorimetry<sup>#</sup> on a Mettler Toledo STAR<sup>e</sup> system with heating/cooling rate of 5 °C/min.

**Table S2: Important Vibrational Spectroscopic Assignments.**

| <b>Compound (cm<sup>-1</sup>)</b> | <b>DC1</b> | <b>DC2</b> | <b>DC3</b> | <b>DC4</b>  | <b>DC5</b>  | <b>DC6</b>  |
|-----------------------------------|------------|------------|------------|-------------|-------------|-------------|
| <b>-C=C- stretch</b>              | 1535       | 1535       | 1530       | 1532        | 1526        | 1520        |
| <b>-C=O</b>                       | 1658, 1600 | 1656,1590  | 1655,1599  | 1655,1607   | 1661,1604   | 1650,1609   |
| <b>=C-H stretch</b>               | 3063       | 3078       | 3059       | 3060        | 3098        | 3061        |
| <b>=C-N stretch</b>               | 1443       | 1440       | 1437       | 1449        | 1436        | 1448        |
| <b>-N-H stretch</b>               | 3374       | 3345       | 3349       | 3314        | 3348        | 3347        |
| <b>-C-O stretch</b>               | 1245       | 1264       | 1227       | 1259        | 1242        | 1212        |
| <b>-N-H bend</b>                  | 632        | 633        | 648        | 641         | 645         | 644         |
| <b>Compound (cm<sup>-1</sup>)</b> | <b>DC7</b> | <b>DC8</b> | <b>DC9</b> | <b>DC10</b> | <b>DC11</b> | <b>DC12</b> |
| <b>-C=C- stretch</b>              | 1541       | 1536       | 1535       | 1558        | 1535        | 1538        |
| <b>-C=O</b>                       | 1667,1614  | 1657,1589  | 1652, 1605 | 1658,1608   | 1655,1594   | 1661, 1605  |
| <b>=C-H stretch</b>               | 3049       | 3071       | 3067       | 3073        | 3075        | 3093        |
| <b>=C-N stretch</b>               | 1454       | 1451       | 1541       | 1488        | 1485        | 1438        |
| <b>-N-H stretch</b>               | 3408       | 3299       | 3309       | 3227        | 3306        | 3357        |
| <b>-C-O stretch</b>               | 1209       | 1261       | 1260       | 1260        | 1269        | 1280        |
| <b>-N-H bend</b>                  | -          | 644        | 655        | 648         | -           | 648         |

| <b>Compound (cm<sup>-1</sup>)</b> | <b>DC13</b> | <b>DC14</b> | <b>DC15</b> |
|-----------------------------------|-------------|-------------|-------------|
| <b>-C=C- stretch</b>              | 1538        | 1513        | 1521        |
| <b>-C=O</b>                       | 1654, 1613  | 1651, 1587  | 1654, 1605  |
| <b>=C-H stretch</b>               | 3060        | 3082        | 3075        |
| <b>=C-N stretch</b>               | 1451        | 1439        | 1404        |
| <b>-N-H stretch</b>               | 3351        | 3337        | 3360        |
| <b>-C-O stretch</b>               | 1280        | 1268        | 1247        |
| <b>-N-H bend</b>                  | 645         | 649         | 623         |

**Table S3: Melting point of the prepared compounds:**

| <b>Compound</b>        | <b>M. P( °C)</b> | <b>Compound</b>         | <b>M. P( °C)</b> |
|------------------------|------------------|-------------------------|------------------|
| <b>DC1</b>             | 101.2            | <b>DC9</b>              | 130.2            |
| <b>DC2<sup>#</sup></b> | 153.6            | <b>DC10</b>             | 96.8             |
| <b>DC3</b>             | 186.8            | <b>DC11</b>             | 129.6            |
| <b>DC4<sup>#</sup></b> | 112.9            | <b>DC12</b>             | 144.3            |
| <b>DC5<sup>#</sup></b> | 144.5            | <b>DC13</b>             | 117.1            |
| <b>DC6<sup>#</sup></b> | 186.1            | <b>DC14</b>             | 149.8            |
| <b>DC7</b>             | 89.61            | <b>DC15<sup>#</sup></b> | 186.8            |
| <b>DC8</b>             | 116.1            |                         |                  |
